# Supplementary material for: An Analytic Approach Using Candidate Gene Selection and Logic Forest to Identify Gene by Environment Interactions (G × E) for Systemic Lupus Erythematosus in African Americans
Source: MDPI journal article supplement (doi:10.3390/genes9100496), 2018-10-15
Supplement: s1 [file s1]

Supplemental Material: An analytic approach using  
candidate gene selection and Logic Forest to identify  
gene by environment interactions ( $G \times E$ ) for systemic  
lupus erythematosus in African Americans.

Bethany J Wolf, Paula S Ramos, J Madison Hyer, Viswanathan Ramakrishnan,  
Gary S Gilkeson, Gary Hardiman, Paul J Nietert, and Diane L Kamen

October 11, 2018

Supplemental Table 1 – Genotype frequencies for each of the SNPs discussed in the Results, Discussion, and Conclusions.

| Gene  | SNP        | Genotype | Frequency (%) |
|-------|------------|----------|---------------|
| ITGAX | rs4632147  | T/T      | 10.6          |
|       |            | T/C      | 42.6          |
|       |            | C/C      | 46.8          |
|       | rs58708589 | C/C      | 15.2          |
|       |            | C/T      | 43.7          |
|       |            | T/T      | 41.1          |
| IRF5  | rs11761199 | G/G      | 3.04          |
|       |            | G/A      | 21.7          |
|       |            | A/A      | 75.3          |
|       | rs11770589 | A/A      | 22.0          |
|       |            | A/G      | 50.6          |
|       |            | G/G      | 27.4          |
| ITGAM | rs4632147  | T/T      | 10.6          |
|       |            | T/C      | 42.6          |
|       |            | C/C      | 46.8          |
|       | rs58708589 | C/C      | 15.2          |
|       |            | C/T      | 43.7          |
|       |            | T/T      | 41.1          |

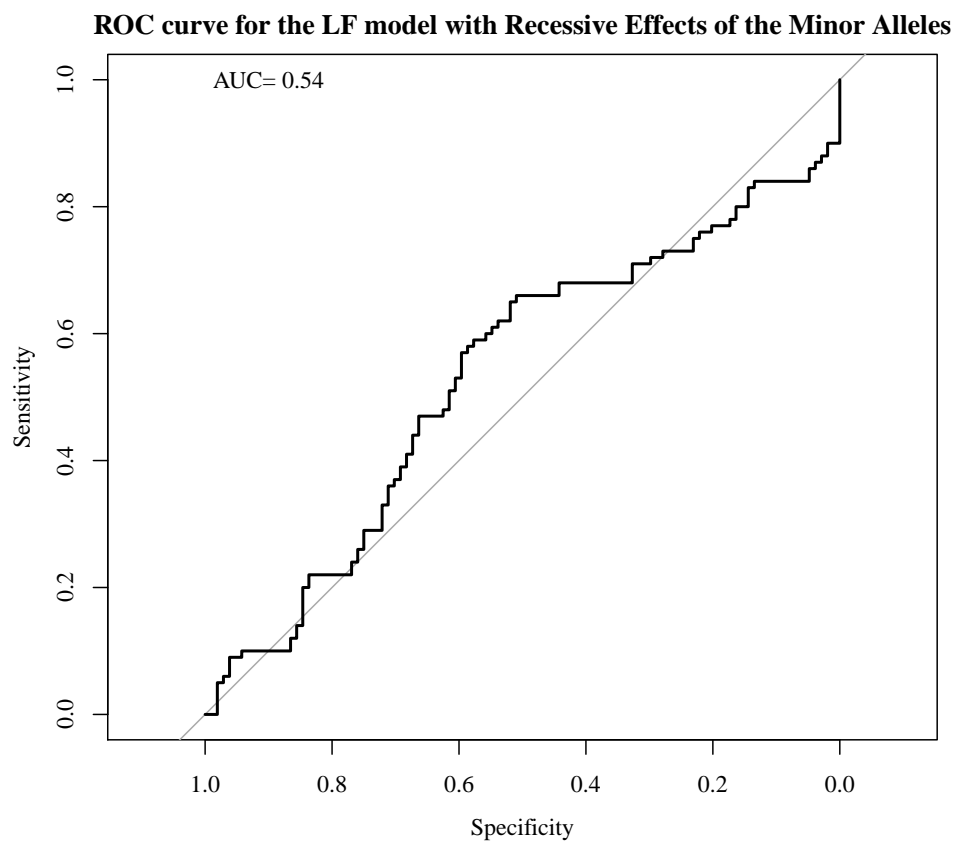

Supplemental Figure 1 – Receiver operating characteristic (ROC) curve for a Logic Forest model of SLE status including the recessive effect of the minor allele for all SNPS, gender, passive smoke exposure as a child and as an adult, and smoking status.
