# Supplementary material for: An Analytic Approach Using Candidate Gene Selection and Logic Forest to Identify Gene by Environment Interactions (G × E) for Systemic Lupus Erythematosus in African Americans
Source: Genes (Basel). 2018 Oct 15;9(10):496. doi: 10.3390/genes9100496 (PMC6211136; doi:10.3390/genes9100496)
Supplement: Supplementary file 1 [file genes-09-00496-s001.zip]

Archive with 7 entries (7 files):
- SupplementalMaterial.log
- SupplementalMaterial.pdf
- SupplementalMaterial.synctex.gz
- SupplementalMaterial.tex
- SuppFig1.pdf
- SupplementalMaterial.aux
- SupplementalMaterial.dvi
