# Supplementary material for: An Analytic Approach Using Candidate Gene Selection and Logic Forest to Identify Gene by Environment Interactions (G × E) for Systemic Lupus Erythematosus in African Americans
Source: Genes (Basel). 2018 Oct 15;9(10):496. doi: 10.3390/genes9100496 (PMC6211136; doi:10.3390/genes9100496)
Supplement: Supplementary file 1 [file genes-09-00496-s001.zip › SupplementalMaterial.aux]

\relax 
\@writefile{lot}{\contentsline {table}{\numberline {1}{\ignorespaces Genotype frequencies for each of the SNPs discussed in the Results, Discussion, and Conclusions.\relax }}{2}}
\@writefile{lof}{\contentsline {figure}{\numberline {1}{\ignorespaces Receiver operating characteristic (ROC) curve for a Logic Forest model of SLE status including the recessive effect of the minor allele for all SNPS, gender, passive smoke exposure as a child and as an adult, and smoking status.\relax }}{3}}
