# Supplementary material for: An Analytic Approach Using Candidate Gene Selection and Logic Forest to Identify Gene by Environment Interactions (G × E) for Systemic Lupus Erythematosus in African Americans
Source: Genes (Basel). 2018 Oct 15;9(10):496. doi: 10.3390/genes9100496 (PMC6211136; doi:10.3390/genes9100496)
Supplement: Supplementary file 1 [file genes-09-00496-s001.zip › SupplementalMaterial.log]

This is pdfTeX, Version 3.14159265-2.6-1.40.16 (MiKTeX 2.9 64-bit) (preloaded format=pdflatex 2016.4.29)  11 OCT 2018 09:07
entering extended mode
**./SupplementalMaterial.tex
(SupplementalMaterial.tex
LaTeX2e <2016/03/31>
Babel <3.9r> and hyphenation patterns for 75 language(s) loaded.
("C:\Program Files\MiKTeX 2.9\tex\latex\base\article.cls"
Document Class: article 2014/09/29 v1.4h Standard LaTeX document class
("C:\Program Files\MiKTeX 2.9\tex\latex\base\size12.clo"
File: size12.clo 2014/09/29 v1.4h Standard LaTeX file (size option)
)
\c@part=\count79
\c@section=\count80
\c@subsection=\count81
\c@subsubsection=\count82
\c@paragraph=\count83
\c@subparagraph=\count84
\c@figure=\count85
\c@table=\count86
\abovecaptionskip=\skip41
\belowcaptionskip=\skip42
\bibindent=\dimen102
)
("C:\Program Files\MiKTeX 2.9\tex\latex\caption\caption.sty"
Package: caption 2016/02/21 v3.3-144 Customizing captions (AR)

("C:\Program Files\MiKTeX 2.9\tex\latex\caption\caption3.sty"
Package: caption3 2016/02/04 v1.7-139 caption3 kernel (AR)
Package caption3 Info: TeX engine: e-TeX on input line 67.

("C:\Program Files\MiKTeX 2.9\tex\latex\graphics\keyval.sty"
Package: keyval 2014/10/28 v1.15 key=value parser (DPC)
\KV@toks@=\toks14
)
\captionmargin=\dimen103
\captionmargin@=\dimen104
\captionwidth=\dimen105
\caption@tempdima=\dimen106
\caption@indent=\dimen107
\caption@parindent=\dimen108
\caption@hangindent=\dimen109
)
\c@ContinuedFloat=\count87
)
("C:\Program Files\MiKTeX 2.9\tex\latex\graphics\graphicx.sty"
Package: graphicx 2014/10/28 v1.0g Enhanced LaTeX Graphics (DPC,SPQR)

("C:\Program Files\MiKTeX 2.9\tex\latex\graphics\graphics.sty"
Package: graphics 2016/01/03 v1.0q Standard LaTeX Graphics (DPC,SPQR)

("C:\Program Files\MiKTeX 2.9\tex\latex\graphics\trig.sty"
Package: trig 2016/01/03 v1.10 sin cos tan (DPC)
)
("C:\Program Files\MiKTeX 2.9\tex\latex\00miktex\graphics.cfg"
File: graphics.cfg 2016/01/02 v1.10 sample graphics configuration
)
Package graphics Info: Driver file: pdftex.def on input line 95.

("C:\Program Files\MiKTeX 2.9\tex\latex\pdftex-def\pdftex.def"
File: pdftex.def 2011/05/27 v0.06d Graphics/color for pdfTeX

("C:\Program Files\MiKTeX 2.9\tex\generic\oberdiek\infwarerr.sty"
Package: infwarerr 2010/04/08 v1.3 Providing info/warning/error messages (HO)
)
("C:\Program Files\MiKTeX 2.9\tex\generic\oberdiek\ltxcmds.sty"
Package: ltxcmds 2011/11/09 v1.22 LaTeX kernel commands for general use (HO)
)
\Gread@gobject=\count88
))
\Gin@req@height=\dimen110
\Gin@req@width=\dimen111
)
(SupplementalMaterial.aux)
\openout1 = `SupplementalMaterial.aux'.

LaTeX Font Info:    Checking defaults for OML/cmm/m/it on input line 30.
LaTeX Font Info:    ... okay on input line 30.
LaTeX Font Info:    Checking defaults for T1/cmr/m/n on input line 30.
LaTeX Font Info:    ... okay on input line 30.
LaTeX Font Info:    Checking defaults for OT1/cmr/m/n on input line 30.
LaTeX Font Info:    ... okay on input line 30.
LaTeX Font Info:    Checking defaults for OMS/cmsy/m/n on input line 30.
LaTeX Font Info:    ... okay on input line 30.
LaTeX Font Info:    Checking defaults for OMX/cmex/m/n on input line 30.
LaTeX Font Info:    ... okay on input line 30.
LaTeX Font Info:    Checking defaults for U/cmr/m/n on input line 30.
LaTeX Font Info:    ... okay on input line 30.
Package caption Info: Begin \AtBeginDocument code.
Package caption Info: End \AtBeginDocument code.

("C:\Program Files\MiKTeX 2.9\tex\context\base\supp-pdf.mkii"
[Loading MPS to PDF converter (version 2006.09.02).]
\scratchcounter=\count89
\scratchdimen=\dimen112
\scratchbox=\box26
\nofMPsegments=\count90
\nofMParguments=\count91
\everyMPshowfont=\toks15
\MPscratchCnt=\count92
\MPscratchDim=\dimen113
\MPnumerator=\count93
\makeMPintoPDFobject=\count94
\everyMPtoPDFconversion=\toks16
) ("C:\Program Files\MiKTeX 2.9\tex\generic\oberdiek\pdftexcmds.sty"
Package: pdftexcmds 2011/11/29 v0.20 Utility functions of pdfTeX for LuaTeX (HO
)

("C:\Program Files\MiKTeX 2.9\tex\generic\oberdiek\ifluatex.sty"
Package: ifluatex 2010/03/01 v1.3 Provides the ifluatex switch (HO)
Package ifluatex Info: LuaTeX not detected.
)
("C:\Program Files\MiKTeX 2.9\tex\generic\oberdiek\ifpdf.sty"
Package: ifpdf 2011/01/30 v2.3 Provides the ifpdf switch (HO)
Package ifpdf Info: pdfTeX in PDF mode is detected.
)
Package pdftexcmds Info: LuaTeX not detected.
Package pdftexcmds Info: \pdf@primitive is available.
Package pdftexcmds Info: \pdf@ifprimitive is available.
Package pdftexcmds Info: \pdfdraftmode found.
)
("C:\Program Files\MiKTeX 2.9\tex\latex\oberdiek\epstopdf-base.sty"
Package: epstopdf-base 2010/02/09 v2.5 Base part for package epstopdf

("C:\Program Files\MiKTeX 2.9\tex\latex\oberdiek\grfext.sty"
Package: grfext 2010/08/19 v1.1 Manage graphics extensions (HO)

("C:\Program Files\MiKTeX 2.9\tex\generic\oberdiek\kvdefinekeys.sty"
Package: kvdefinekeys 2011/04/07 v1.3 Define keys (HO)
))
("C:\Program Files\MiKTeX 2.9\tex\latex\oberdiek\kvoptions.sty"
Package: kvoptions 2011/06/30 v3.11 Key value format for package options (HO)

("C:\Program Files\MiKTeX 2.9\tex\generic\oberdiek\kvsetkeys.sty"
Package: kvsetkeys 2012/04/25 v1.16 Key value parser (HO)

("C:\Program Files\MiKTeX 2.9\tex\generic\oberdiek\etexcmds.sty"
Package: etexcmds 2011/02/16 v1.5 Avoid name clashes with e-TeX commands (HO)
Package etexcmds Info: Could not find \expanded.
(etexcmds)             That can mean that you are not using pdfTeX 1.50 or
(etexcmds)             that some package has redefined \expanded.
(etexcmds)             In the latter case, load this package earlier.
)))
Package grfext Info: Graphics extension search list:
(grfext)             [.png,.pdf,.jpg,.mps,.jpeg,.jbig2,.jb2,.PNG,.PDF,.JPG,.JPE
G,.JBIG2,.JB2,.eps]
(grfext)             \AppendGraphicsExtensions on input line 452.
)
LaTeX Font Info:    External font `cmex10' loaded for size
(Font)              <20.74> on input line 35.
LaTeX Font Info:    External font `cmex10' loaded for size
(Font)              <14.4> on input line 35.
LaTeX Font Info:    External font `cmex10' loaded for size
(Font)              <12> on input line 35.
LaTeX Font Info:    External font `cmex10' loaded for size
(Font)              <7> on input line 35.

Overfull \hbox (52.90979pt too wide) in paragraph at lines 35--35
 [][] 
 []

LaTeX Font Info:    External font `cmex10' loaded for size
(Font)              <8> on input line 40.
LaTeX Font Info:    External font `cmex10' loaded for size
(Font)              <6> on input line 40.
[1

{C:/Users/wolfb/AppData/Local/MiKTeX/2.9/pdftex/config/pdftex.map}] [2]
<SuppFig1.pdf, id=12, 505.89pt x 433.62pt>
File: SuppFig1.pdf Graphic file (type pdf)
 <use SuppFig1.pdf>
Package pdftex.def Info: SuppFig1.pdf used on input line 70.
(pdftex.def)             Requested size: 379.41655pt x 325.2142pt.
 [3 <./SuppFig1.pdf>] (SupplementalMaterial.aux) ) 
Here is how much of TeX's memory you used:
 2560 strings out of 493340
 40424 string characters out of 3139336
 94275 words of memory out of 3000000
 6093 multiletter control sequences out of 15000+200000
 8510 words of font info for 30 fonts, out of 3000000 for 9000
 1141 hyphenation exceptions out of 8191
 37i,7n,39p,362b,265s stack positions out of 5000i,500n,10000p,200000b,50000s
<C:/Program Files/MiKTeX 2.9/
fonts/type1/public/amsfonts/cm/cmbx12.pfb><C:/Program Files/MiKTeX 2.9/fonts/ty
pe1/public/amsfonts/cm/cmr12.pfb><C:/Program Files/MiKTeX 2.9/fonts/type1/publi
c/amsfonts/cm/cmr17.pfb><C:/Program Files/MiKTeX 2.9/fonts/type1/public/amsfont
s/cm/cmsy10.pfb>
Output written on SupplementalMaterial.pdf (3 pages, 60903 bytes).
PDF statistics:
 35 PDF objects out of 1000 (max. 8388607)
 0 named destinations out of 1000 (max. 500000)
 6 words of extra memory for PDF output out of 10000 (max. 10000000)
