# Supplementary material for: An Analytic Approach Using Candidate Gene Selection and Logic Forest to Identify Gene by Environment Interactions (G × E) for Systemic Lupus Erythematosus in African Americans
Source: Genes (Basel). 2018 Oct 15;9(10):496. doi: 10.3390/genes9100496 (PMC6211136; doi:10.3390/genes9100496)
Supplement: Supplementary file 1 [file genes-09-00496-s001.zip › SupplementalMaterial.tex]

\documentclass[12pt,letterpaper]{article}

\renewcommand{\figurename}{Supplemental Figure}
\renewcommand{\tablename}{Supplemental Table}

\usepackage[labelsep=endash]{caption}
%\usepackage{setspace}
%\usepackage{courier}
%\usepackage{listings}
%\usepackage{amsmath}
\usepackage{graphicx}

%%%%%%%%%%%%%%%%%%%%%%%%%%%%%%%%%%%%%%%%%%%%%%%%%%%%%
% Page Layout Information
    \oddsidemargin  0.0in
    \evensidemargin 0.0in
    \textwidth      6.25in
%    \textwidth      7.00in
    \headheight     0.2in
    \textheight	    9.25in
    \topmargin      -3.0pc
%%%%%%%%%%%%%%%%%%%%%%%%%%%%%%%%%%%%%%%%%%%%%%%%%%%%
\renewcommand{\baselinestretch}{1.8}  %THIS COMMAND RUINS the NEW ENVIROMENT for ITEMIZE

\author{Bethany J Wolf, Paula S Ramos, J Madison Hyer, Viswanathan Ramakrishnan,\\
 Gary S Gilkeson, Gary Hardiman, Paul J Nietert, and Diane L Kamen}


\begin{document}
%\begin{singlespace}
 
\title{Supplemental Material: An analytic approach using candidate gene selection and Logic Forest to identify gene by environment interactions (G$\times$E) for systemic lupus erythematosus in African Americans.}
%\date{\small (8:30am - 10:30pm, July 6, 2017)}
\maketitle

\begin{table}
\centering
\caption{Genotype frequencies for each of the SNPs discussed in the Results,  Discussion, and Conclusions.}
\begin{tabular}{lccc}
\hline
\textbf{Gene}	& \textbf{SNP}	& \textbf{Genotype}	& \textbf{Frequency (\%)}\\
\hline
ITGAX 			& rs4632147		& T/T				& 10.6 	\\
	 			& 				& T/C				& 42.6 	\\
	 			& 				& C/C				& 46.8 	\\
				& rs58708589	& C/C				& 15.2 	\\
	 			&				& C/T				& 43.7 	\\
	 			& 				& T/T				& 41.1 	\\
IRF5 			& rs11761199	& G/G				& 3.04 	\\
	 			&				& G/A				& 21.7 	\\
	 			& 				& A/A				& 75.3 	\\
	 			& rs11770589	& A/A				& 22.0 	\\
	 			&				& A/G				& 50.6 	\\
	 			& 				& G/G				& 27.4 	\\
ITGAM 			& rs4632147		& T/T				& 10.6 	\\
	 			& 				& T/C				& 42.6 	\\
	 			& 				& C/C				& 46.8 	\\
				& rs58708589	& C/C				& 15.2 	\\
	 			&				& C/T				& 43.7 	\\
	 			& 				& T/T				& 41.1 	\\
\hline
\end{tabular}
\end{table}

\pagebreak

\begin{figure}
\centering
\includegraphics[scale=0.75]{SuppFig1.pdf}]
\caption{Receiver operating characteristic (ROC) curve for a Logic Forest model of SLE status including the recessive effect of the minor allele for all SNPS, gender, passive smoke exposure as a child and as an adult, and smoking status.}
\end{figure}   


%\end{singlespace}

\end{document}
