# Supplementary figures and images for: An Analytic Approach Using Candidate Gene Selection and Logic Forest to Identify Gene by Environment Interactions (G × E) for Systemic Lupus Erythematosus in African Americans
Source: MDPI journal article supplement (doi:10.3390/genes9100496), 2018-10-15

**ROC curve for the LF model with Recessive Effects of the Minor Alleles**

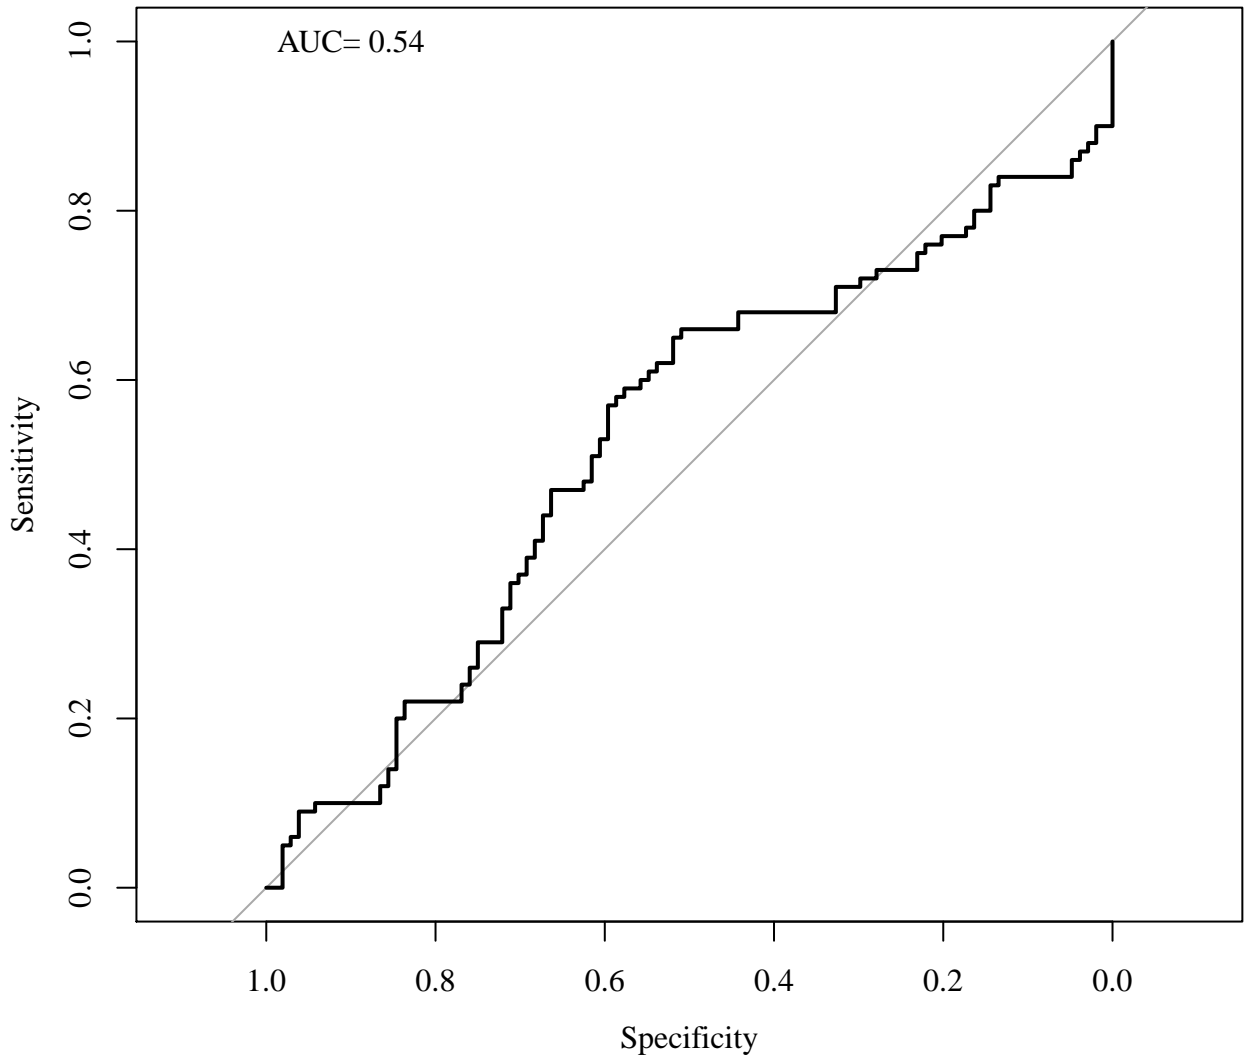

Supplement: s1 [file s1]
